# Supplementary material for: Tumor-specific activity of precision medicines in the NCI-MATCH trial
Source: bioRxiv or medRxiv preprint supplement (doi:10.1101/2023.03.30.23287951), 2023-03-31
Supplement: Supplementary file [file media-1.pdf]

**Supplementary Table 1. NCI-MATCH subprotocols with published results**

| #  | Journal                      | Subprotocol | Title                                                                                                                                                                                                                                                                                                          | Objective Response Rate (ORR) |
|----|------------------------------|-------------|----------------------------------------------------------------------------------------------------------------------------------------------------------------------------------------------------------------------------------------------------------------------------------------------------------------|-------------------------------|
| 1  | Annals of Oncology           | Q           | Ado-trastuzumab emtansine (T-DM1) in patients with HER2 amplified tumors excluding breast and gastric/gastro-esophageal junction (GEJ) adenocarcinomas: Results from the NCI-MATCH Trial (EAY131) Subprotocol Q<br>Jhaveri KL. <i>Ann Oncol.</i> 2019; 30:1821                                                 | 5.6%                          |
| 2  | Journal of Clinical Oncology | Z1D         | Nivolumab Is Effective in Mismatch Repair–Deficient Noncolorectal Cancers: Results From Arm Z1D—A Subprotocol of the NCI-MATCH (EAY131) Study<br>Azad NS. <i>J Clin Oncol.</i> 2020; 38:214                                                                                                                    | 36%                           |
| 3  | Clinical Cancer Research     | R           | Trametinib activity in patients with solid tumors and lymphomas harboring BRAF non-V600 mutations or fusions: Results from NCI-MATCH (EAY131)<br>Johnson DB. <i>Clin Cancer Res.</i> 2020; 26:1812                                                                                                             | 3%                            |
| 4  | Journal of Clinical Oncology | W           | Phase II Study of AZD4547 in Patients With Tumors Harboring Aberrations in the FGFR Pathway: Results From the NCI-MATCH Trial (EAY131) Subprotocol W<br>Chae YK. <i>J Clin Oncol.</i> 2020; 38:2407                                                                                                            | 8%                            |
| 5  | Journal of Clinical Oncology | H           | Dabrafenib and Trametinib in Patients With Tumors With BRAFV600E Mutations: Results of the NCI-MATCH Trial Subprotocol H<br>Salama AKS. <i>J Clin Oncol.</i> 2020; 38:3895                                                                                                                                     | 37.5%                         |
| 6  | JAMA Oncology                | Y           | Effect of Capivasertib in Patients with an AKT1 E17K-mutated Tumor: NCI-MATCH Subprotocol EAY131-Y Nonrandomized Trial<br>Kalinsky KM. <i>JAMA Oncol.</i> 2021; 7:271                                                                                                                                          | 28.6%                         |
| 7  | Clinical Cancer Research     | Z1A         | Differential Outcomes in Codon 12/13 and Codon 61 NRAS-Mutated Cancers in the Phase 2 NCI-MATCH Trial of Binimetinib in Patients with NRAS-Mutated Tumors<br>Cleary JM. <i>Clin Cancer Res.</i> 2021; 27:2996                                                                                                  | 2.1%                          |
| 8  | Journal of Clinical Oncology | I           | Phase II Study of Taselisib in PIK3CA Mutated Solid Tumors Other Than Breast and Squamous Lung Cancer: Results From the NCI-MATCH ECOG-ACRIN Trial (EAY131) Subprotocol I<br>Krop IE. <i>JCO Precis Oncol.</i> 2022;6:e2100424                                                                                 | 0%                            |
| 9  | Journal of Clinical Oncology | Z1F         | Phase II Study of Copanlisib in Patients With Tumors With PIK3CA Mutations: Results From the NCI-MATCH ECOG-ACRIN Trial (EAY131) Subprotocol Z1F<br>Damodaran S. <i>J Clin Oncol.</i> 2022; 40:1552                                                                                                            | 16%                           |
| 10 | NPJ Precision Oncology       | F, G        | Crizotinib in patients with tumors harboring ALK or ROS1 rearrangements in the NCI-MATCH trial<br>Mansfield AS. <i>NPJ Precis Oncol.</i> 2022; 6:13                                                                                                                                                            | 50%, 25%                      |
| 11 | Journal of Clinical Oncology | B           | Phase II Study of Afatinib in Patients With Tumors With Human Epidermal Growth Factor Receptor 2–Activating Mutations: Results From the National Cancer Institute–Molecular Analysis for Therapy Choice ECOG-ACRIN Trial (EAY131) Subprotocol EAY131-B<br>Bedard PL. <i>JCO Precis Oncol.</i> 2022; 6:e2200165 | 2.7%                          |
